1 **Title**

2  
3 **Isotropic Three-Dimensional Dual-Color Super-Resolution Microscopy with**  
4 **Metal-Induced Energy Transfer**  
5

6 **Authors**

7 Jan Christoph Thiele,<sup>1</sup> Marvin Jungblut,<sup>2</sup> Dominic A. Helmerich,<sup>2</sup> Roman Tsukanov,<sup>1</sup> An-  
8 na Chizhik,<sup>1</sup> Alexey I. Chizhik,<sup>1</sup> Martin Schnermann,<sup>3</sup> Markus Sauer,<sup>2</sup>  
9 Oleksii Nevskyi<sup>1\*</sup> and Jörg Enderlein<sup>1,4\*</sup>

10  
11 **Affiliations**

12 <sup>1</sup> III. Institute of Physics – Biophysics, Georg August University,  
13 37077 Göttingen, Germany.

14  
15 <sup>2</sup> Department of Biotechnology and Biophysics, Biocenter, University of Würzburg,  
16 Am Hubland, 97074 Würzburg, Germany.

17  
18 <sup>3</sup> Chemical Biology Laboratory, Center for Cancer Research, National Cancer Institute,  
19 Frederick, 21702 Maryland, United States.

20  
21 <sup>4</sup> Cluster of Excellence “Multiscale Bioimaging: from Molecular Machines to Networks of  
22 Excitable Cells” (MBExC), Georg August University, Göttingen, Germany.

23  
24 \* Corresponding authors. Email: [oleksii.nevskyi@phys.uni-goettingen.de](mailto:oleksii.nevskyi@phys.uni-goettingen.de);  
25 [jenderl@gwdg.de](mailto:jenderl@gwdg.de).

26  
27 **Abstract**

28 Over the last two decades, super-resolution microscopy has seen a tremendous develop-  
29 ment in speed and resolution, but for most of its methods, there exists a remarkable gap  
30 between lateral and axial resolution. Similar to conventional optical microscopy, the axial  
31 resolution is by a factor three to five worse than the lateral resolution. One recently devel-  
32 oped method to close this gap is metal-induced energy transfer (MIET) imaging which  
33 achieves an axial resolution down to nanometers. It exploits the distance dependent  
34 quenching of fluorescence when a fluorescent molecule is brought close to a metal sur-  
35 face. In the present manuscript, we combine the extreme axial resolution of MIET imaging  
36 with the extraordinary lateral resolution of single-molecule localization microscopy, in  
37 particular with direct stochastic optical reconstruction microscopy (*d*STORM). This com-  
38 bination allows us to achieve isotropic three-dimensional super-resolution imaging of sub-  
39 cellular structures. Moreover, we employed spectral demixing for implementing dual-  
40 color MIET-*d*STORM that allows us to image and co-localize, in three dimensions, two  
41 different cellular structures simultaneously.

## 42 Introduction

43  
44 Super-resolution microscopy has revolutionized optical imaging by extending the limits of  
45 spatial resolution by three orders of magnitude down to a few nanometers. The first truly  
46 super-resolving microscopy methods were Stimulated Emission Depletion (STED) mi-  
47 croscopy<sup>[1]</sup> and later REversible Saturated Optical Fluorescence Transitions  
48 (RESOLFT)<sup>[2]</sup> developed by Stefan Hell and coworkers. This pioneering work spurred the  
49 development of another class of super-resolution methods, Single-Molecule Localization  
50 Microscopy (SMLM), which is based on the idea that one can localize the center position  
51 of an individual fluorescent molecule with much higher accuracy than the width of the  
52 molecule's image (defined by the optical resolution of a microscope). SMLM comprises  
53 methods such as Stochastic Optical Reconstruction Microscopy (STORM),<sup>[3]</sup>  
54 PhotoActivatable Localization Microscopy (PALM),<sup>[4]</sup> Point Accumulation for Imaging in  
55 Nanoscale Topography (PAINT)<sup>[5]</sup> microscopy, its commonly used variant DNA-  
56 PAINT,<sup>[6]</sup> or *direct* STORM (*d*STORM).<sup>[7]</sup>

57 All of the above mentioned methods provide superb lateral resolution, but cellular struc-  
58 tures are of course intrinsically three-dimensional. Thus, several approaches have been  
59 developed to extend the super-resolution capabilities to the third dimension. For STED,  
60 the use of special phase plates allows for generating stimulated emission intensity distribu-  
61 tions with particular resolution enhancement along the optical axis.<sup>[8]</sup> For SMLM, differ-  
62 ent techniques have been introduced such as biplane imaging,<sup>[9]</sup> astigmatic imaging,<sup>[10]</sup> or  
63 various point spread function (PSF) designs such as double-helix PSF,<sup>[11]</sup> corkscrew  
64 PSF,<sup>[12]</sup> or Tetrapod PSF<sup>[13]</sup>. Recently, clever PSF phase self-modulation has been used for  
65 three-dimensional SMLM deep in tissue.<sup>[14]</sup> However, all these techniques provide an axi-  
66 al resolution that is by a factor 3-5 worse than the achievable lateral resolution, very simi-  
67 lar to the resolutions achieved in conventional, diffraction-limited confocal laser scanning  
68 microscopy (CLSM).

69 This gap between lateral and axial resolution was closed by  $4\pi$  interferometric microscopy  
70 techniques that interfere the emission of a molecule detected from two opposite sides with  
71 two objectives. This leads to a dramatic improvement in axial resolution as demonstrated  
72 by interferometric PALM (iPALM),<sup>[15]</sup> isoSTED,<sup>[16]</sup> or whole-cell 4Pi single-molecule  
73 switching nanoscopy (W-4PiSMSN).<sup>[17]</sup> However, these methods are based on macroscopic  
74 interferometers that are experimentally very challenging to operate, which prevented  
75 their wide distribution and application so far. One of the latest additions to the zoo of 3D  
76 SMLM is 3D-MINFLUX.<sup>[18]</sup> With 3D-MINFLUX, it is possible to localize single mole-  
77 cules with sub-nanometer accuracy by detecting as few as some hundred photons.<sup>[19]</sup>  
78 Moreover, the recently introduced pulsed interleaved MINFLUX (p-MINFLUX) simpli-  
79 fies the experimental setup making it potentially more amenable for wider use.<sup>[20]</sup> Howev-  
80 er, the currently existing versions of MINFLUX suffer from low throughput (number of  
81 localized molecules per time) and are still technically more complex than almost all  
82 SMLM methods that are based on conventional wide-field microscopes.

83 An attractive alternative to the above mentioned interferometric methods are techniques  
84 based on evanescent fields. The first of these approaches uses the exponentially decaying  
85 excitation intensity in a total internal reflection fluorescence microscope (TIRFM), where  
86 the sample is illuminated from the glass side with a plane wave incident under a high an-  
87 gle above the critical angle of total internal reflection (TIR). That generates an evanescent  
88 electromagnetic field on the sample side, so that the excitation intensity that a molecule

89 sees depends on its distance from the surface. By taking several snapshots for excitations  
90 under different excitation angles, and thus modulating the exponential decay of the evanescent  
91 field intensity, it is possible to calculate distances of molecules (fluorescent structures)  
92 from the surface with a few nanometer precision (variable angle TIRFM or vaTIRFM).<sup>[21, 22]</sup>  
93 Alternatively, one can use the evanescent field of fluorescence emission  
94 for measuring molecule-surface distance values. One of the first realizations of this idea  
95 was super-critical angle fluorescence detection, which uses the fact that the evanescent  
96 field of an emitting molecule can couple into propagating light modes on the glass side,  
97 which can then be detected with an objective of sufficiently high numerical aperture. This  
98 coupling efficiency is again highly distance dependent, due to the evanescent nature of the  
99 coupled field. By comparing the intensity of this supercritical emission (named so for its  
100 emission angles above the critical TIR angle) with “classical” emission below the critical  
101 TIR angle (which does not depend on molecule-surface distance) one can again deduce  
102 distance values of single molecules with an accuracy of few nanometers.<sup>[23-25]</sup>

103 Another technique that exploits the evanescent field of fluorescence emission is Metal-  
104 Induced Energy Transfer (MIET).<sup>[26]</sup> The technique uses the distance-dependent coupling  
105 of the evanescent field of a fluorescent emitter to surface plasmons in a thin metallic layer  
106 deposited on the surface of the glass cover slide. The resulting energy transfer is extremely  
107 distance dependent and leads to a distance-dependent fluorescence lifetime and intensity  
108 of the emitter, which can be used to determine molecule-distance values with nanometer  
109 accuracy (single-molecule MIET or smMIET),<sup>[27-29]</sup> despite the unavoidable fluorescence  
110 intensity losses due to partial light absorption by the metal film. This is due to the fact  
111 that, although the fluorescence brightness of a dye is increasingly reduced the closer the  
112 dye comes to the metal surface, its photo-stability increases proportionally, so that the average  
113 number of detectable photons from one molecule until photobleaching is nearly independent  
114 on dye-metal distance. Due to the broad absorption spectra of metals, the energy transfer  
115 from a fluorescent molecule to the metal takes place with high efficiency across the full  
116 emission spectrum of a molecule. Meanwhile, MIET imaging was successfully employed  
117 for studying various biological questions, for example blood platelet spreading and  
118 adhesion,<sup>[30]</sup> the reorganization of the actin cytoskeleton during epithelial to mesenchymal  
119 cell transformation,<sup>[31]</sup> or the measurement of the inter-bilayer distance of a nuclear  
120 envelope.<sup>[32]</sup> An interesting alternative to a metal film as energy acceptor is graphene,  
121 which shows a much steeper lifetime-versus-distance dependence,<sup>[33]</sup> and which allows  
122 for achieving an order-of-magnitude better axial localization accuracy, down to a  
123 few Angstrom.<sup>[34-36]</sup>

124 Thus, a combination of MIET imaging with the high lateral resolution of SMLM could  
125 provide isotropic three-dimensional super-resolution imaging of cellular structures. However,  
126 SMLM techniques traditionally utilize wide-field imaging while MIET requires precise  
127 single molecule lifetime measurements that typically rely on CLSMs. To overcome this  
128 problem, we recently introduced CLSM for fluorescence lifetime SMLM (FL-SMLM) imaging.<sup>[37]</sup>  
129 This technique has several advantages in comparison to wide-field SMLM, like a light  
130 exposure limited to only the scanned area and optical sectioning that allows imaging  
131 deeply into the cell. But most importantly, it provides lifetime-information on a single  
132 molecule basis which enables lifetime-based multiplexing within the same spectral  
133 window and therefore allows for chromatic aberration-free super-resolution imaging of  
134 multiple cellular structures.

135 In this work, we present a combination of smMIET with *d*STORM, one of the most pow-  
136 erful and widely used SMLM techniques. Our approach combines all the advantages  
137 of FL-SMLM with the exquisite axial resolution of MIET imaging. Firstly, we demon-  
138 strate MIET-*d*STORM on imaging DNA-labelled polymer beads and surface-immobilized  
139 dsDNA-constructs. To show that MIET-*d*STORM can be used for a wide range of biolog-  
140 ical applications, we imaged microtubules and clathrin coated pits in fixed U2OS and  
141 COS-7 cells. Moreover, dual-color MIET allowed for simultaneous imaging of both struc-  
142 tures when utilizing spectral demixing *d*STORM (sd-*d*STORM).<sup>[38]</sup>

## 144 Results and Discussion

### 145 Validation of MIET-SMLM

147 In MIET-SMLM, the axial information is encoded in the fluorescence lifetime. To access  
148 the single-molecule lifetimes, we performed FL-SMLM with a custom-built confocal mi-  
149 croscope with a fast laser scanner, single-photon detection, and TCSPC electronics (for  
150 more details see Figure S1).

151 For validation of the method, and to check the axial precision of smMIET, we immobi-  
152 lized Alexa Fluor 647-dsDNA-biotin constructs on a gold-coated cover glass topped with  
153 a SiO<sub>2</sub> spacer layer of well-defined thickness. We used the dye Alexa Fluor 647 (AF 467)  
154 for labeling which is known for its good performance in *d*STORM measurements. Meas-  
155 ured TCSPC curves (Figure 1a) and single molecule lifetime histograms (Figure 1b) show  
156 the expected lifetime increase with increasing spacer thickness. From the MIET measure-  
157 ments, we deduce that the BSA-neutravidin immobilization layer has a thickness of ~12  
158 nm which is in excellent agreement with literature values.<sup>[39]</sup> The width of the height dis-  
159 tributions (Figure 1d) reflects the surface roughness and axial localization precision.  
160 Therefore, the data confirms that the axial localization precision is below 10 nm up to a  
161 height of 60 nm.

### 162 Imaging biological structures utilizing MIET-SMLM

163 3D imaging with MIET-SMLM is compatible with biological samples. To demonstrate  
164 this, cells were seeded on a cover glass coated with 10 nm of gold and 5 nm of SiO<sub>2</sub> using  
165 standard immunofluorescence sample preparation procedures (see methods for details).  
166 The SiO<sub>2</sub> layer is crucial to protect the gold from the chemically reductive environment  
167 during sample preparation and from the thiols in the imaging buffer. Due to their well-  
168 defined structure, microtubules are a popular benchmark sample. Therefore, we first im-  
169 aged  $\alpha$ -tubulin in U2OS cells (see Figure 2a) which were chosen due to their planarity.  
170 The diffraction limited FLIM image (Figure 2b) already reveals clear lifetime differences  
171 along the microtubules but the finer details become only visible in the FL-SMLM recon-  
172 struction. For each single molecule, lifetime values were converted to height values to ob-  
173 tain its 3D position. In Figure 3c, a super-resolved reconstruction from 3D localizations,  
174 subtle height differences on the order of a microtubule diameter become visible in the  
175 network. MIET-SMLM does not compromise the lateral localization precision, which we  
176 estimated to be 9.1 nm using a modified Mortensen equation.<sup>[40, 41]</sup>

177 Employing MIET does not restrict the choice of possible fluorophores. We have per-  
178 formed MIET-SMLM with several types of fluorophores, such as AF 647 and CF 680 for  
179 classical *d*STORM imaging, and Cy5b for reductive caging SMLM (see Figure S2).<sup>[42]</sup>  
180 This demonstrates that MIET-SMLM is completely independent of the switching mecha-  
181 nism or measurement conditions. For correctly modeling MIET imaging as required for  
182 data evaluation (conversion of lifetime into distance values), exact knowledge of emission  
183 spectra, fluorescence quantum yields and fluorescence lifetimes of the used fluorophores  
184 (in the absence of any metal quenching) is required. Therefore, we performed lifetime ref-  
185 erence measurements on fluorophores far away from the gold-coated cover glass, and we  
186 determined absolute values of fluorescence quantum yield of antibody-conjugated  
187 fluorophores utilizing a recently developed nanocavity-method (see Table S1).<sup>[43]</sup>

## 188 Simultaneous dual-color MIET-SMLM

189 The nature of excitation and detection in a CLSM facilitates extension to spectrally-  
190 resolved imaging. We implemented dual-color detection by splitting the fluorescence sig-  
191 nal, with an additional dichroic mirror, into two separate detection channels, each  
192 equipped with a single-photon sensitive detector (for details, see Methods section and Fig-  
193 ure S1). With this system, we performed *sd-d*STORM on COS-7 cells with AF 647 la-  
194 belled  $\alpha$ -tubulin and CF 680 labelled clathrin. The spectral and photophysical properties of  
195 these two fluorophores make them good candidates for spectral demixing (see Figure S3).  
196 In the spectral-resolved reconstruction shown in Figure 3b, it is straightforward to distin-  
197 guish the two targets  $\alpha$ -tubulin and clathrin. The different relative intensities of the two  
198 dyes in the two detection channels allows for classification of single molecules with negli-  
199 gible crosstalk and separate reconstruction of the two targets (Figure S4). Spectral-  
200 splitting CLSM has the advantage that no channel registration is required and that, due to  
201 single-photon counting with almost zero dark counts, the signal-to-noise ratio is excellent.  
202 Both aspects are important for achieving highest lateral localization precision, which was  
203 estimated to be 9.0 nm for both targets. Moreover, the spectral splitting does not interfere  
204 with the lifetime measurement. Measured lifetime values of AF 647 and CF 680 were  
205 converted to height values using the corresponding MIET curve for each fluorophore. In  
206 Figure 3c, a 3D-*d*STORM image of both targets is presented. Separate super-resolved  
207 height images for  $\alpha$ -tubulin and clathrin are shown in Figure S4. For both targets, we find  
208 structures at height values from below 80 nm to above 130. To highlight the quality of the  
209 obtained 3D data, we plotted x-z cross-sections of the microtubules marked in Figure 3d.  
210 The hollow structure and the size of the microtubules match theoretical expectations when  
211 taking into account that the labelling with secondary antibodies adds an additional distance  
212 between the fluorophores and the imaged structures.<sup>[44]</sup> Our data confirms that MIET-  
213 STORM archives high localization precision in all three dimension in complex, biological  
214 samples.

## 215 Conclusions

216 In this work, we presented a new method for 3D super-resolution microscopy. The combi-  
217 nation of the high axial precision of MIET imaging with the high lateral resolution of  
218 SMLM allows for isotropic single molecule localization in 3D. The achieved axial locali-  
219 zation precision is below 10 nm within the first 60 nm from the gold coated cover glass  
220 surface. By adding spacer layers or choosing a different substrate, such as graphene,<sup>[45]</sup> the  
221 axial range and sensitivity could be adapted to a given sample. MIET-SMLM is straight-  
222 forward to implement on commercial CLSMs with TCSPC capability and fast laser scan-



223       ning. We have demonstrated MIET-SMLM utilizing *d*STORM for imaging cellular struc-  
224       tures. Moreover, dual-color MIET imaging via spectral demixing allowed for simultane-  
225       ous imaging of two different biological structures without compromising resolution.  
226       MIET-SMLM could become a powerful tool for multiplexed 3D super-resolution micros-  
227       copy with exceptionally high isotropic resolution and manifold applications in structural  
228       biology.

## 229       **Materials and Methods**

### 230       ***Confocal microscope***

231  
232  
233  
234       Fluorescence lifetime measurements were performed on a custom-built confocal setup.  
235       Fluorescence excitation was done with a 640 nm 40 MHz pulsed diode laser (PDL 800-B  
236       driver with LDH-D-C-640 diode, PicoQuant). After passing through a clean-up filter  
237       (MaxDiode 640/8, Semrock), a quarter-wave-plate converted the linearly polarized laser  
238       light into circularly polarized light. Subsequently, the laser beam was coupled into a sin-  
239       gle-mode fiber (PMC-460Si-3.0-NA012-3APC-150-P, Schäfter + Kirchhoff) with a fiber-  
240       coupler (60SMS-1-4-RGBV-11-47, Schäfter + Kirchhoff). After the fiber, the output beam  
241       was collimated by an air objective (UPlanSApo 10× /0.40 NA, Olympus). An ultra-flat  
242       quad-band dichroic mirror (ZT405/488/561/640rpc, Chroma) reflected the excitation light  
243       towards the microscope. After passing a laser scanning system (FLIMbee, PicoQuant), the  
244       light was sent into the custom side port of the microscope (IX73, Olympus). The three  
245       galvo mirrors of the scanning system deflect the beam while preserving the beam position  
246       in the back focal plane of the objective (UApo N 100× /1.49 NA oil, Olympus). Sample  
247       position is adjusted by using the manual XY stage of the microscope (IX73, Olympus) and  
248       a z-piezo stage (Nano-ZL100, MadCityLabs). Fluorescence light was collected by the  
249       same objective and de-scanned by the scanning system. An achromatic lens (TTL180-A,  
250       Thorlabs) focuses the de-scanned beam onto a pinhole (100 μm P100S, Thorlabs).  
251       Backscattered/back-reflected excitation laser light was blocked by a long-pass filter (635  
252       LP Edge Basic, Semrock). After the pinhole, the emission light was collimated by a  
253       100 mm lens. An additional band-pass filter (BrightLine HC 679/41, Semrock) was used  
254       for further rejection of scattered excitation light. Finally, the emission light was focused  
255       onto a SPAD-detector (SPCM-AQRH, Excelitas) with an achromatic lens (AC254-030-A-  
256       ML, Thorlabs).

257  
258       For *sd-d*STORM, a dichroic mirror (FF685-Di02, Semrock) was used to split the fluores-  
259       cence signal into two channels, which were focused onto two separate SPAD-detectors. In  
260       front of the two detectors, band-pass filters BrightLine HC 679/41 and BrightLine HC  
261       708/75 were placed, respectively (for more details see Figure S1).

262  
263       Output signals of the photon detectors were recorded with a TCSPC electronics  
264       (HydraHarp 400, PicoQuant) that was synchronized by a trigger signal from the excitation  
265       laser. Images were acquired with the software SymPhoTime 64 (PicoQuant), which con-  
266       trolled both the TCSPC electronics and the scanner. Typically, samples were scanned with  
267       a virtual pixel size of 100 nm, a dwell time of 2.5 μs/pixel, and a TCSPC time resolution  
268       of 16 ps.

### 269       ***MIET imaging***

270  
271

272 For MIET measurements of COS-7/U2OS cells, samples were prepared on glass coverslips coated with 2 nm titanium, 10 nm gold, 1 nm titanium, and 5 nm silicon dioxide, while for measurements of polymer beads, samples were prepared on glass coverslips coated with 2 nm titanium, 5 nm gold, 1 nm titanium, and 10 nm silicon dioxide. Gold layers were generated by chemical vapor deposition using an electron beam source (Univex 350, Leybold) under high-vacuum conditions ( $\sim 10^{-6}$  mbar). A thin silicon dioxide layer of a few nanometers was used for both protecting the gold layer from the thiol buffer and for achieving an optimal distance between sample and gold layer (most sensitive region of MIET curve).

281 For MIET calibration measurements, we used gold-coated coverslips with SiO<sub>2</sub> spacers of different thickness on top. The coverslips were rinsed with methanol, and dried using air flow. Four-well silicone inserts (Ibidi 80469, Germany) were attached to a coverslip to form four-well chambers. DNA-fluorophore constructs were immobilized on the surface using biotin-avidin as follows: BSA-biotin (A8549, Sigma-Aldrich) was dissolved and diluted in buffer A (10 mM Tris, 50mM NaCl, pH 8.0) to a concentration of 0.5 mg/mL and added to the chamber and incubated overnight at 4°C. Afterwards, the chamber was flushed with buffer A up to the volume of the chamber for at least 3 times. Neutravidin (31000, Thermo Fisher Scientific) was dissolved and diluted in buffer A to a concentration of 0.5 mg/mL, injected into a chamber and incubated for 5 to 15 min. Then, the neutravidin solution was removed from a chamber by rinsing with buffer A for at least 3 times. Solution with dsDNA-fluorophore at a concentration of 500 pM was added to a chamber and incubated for a few minutes, until sparse coverage of the surface with fluorescent molecules was achieved. The coverage density was controlled visually, and once a desired surface coverage density was reached, the dsDNA leftovers were washed out with B4 buffer (10mM Tris, 1mM EDTA, pH 8.0) including 500 mM NaCl. Imaging was done until all fluorophores photobleached

### 300 *Data analysis*

301 Confocal *d*STORM measurements were analyzed with an extended version of the software packed TrackNTrace.<sup>[37, 46]</sup> From raw scan data, images were generated by combining 10 scans into one frame. When using TrackNTrace, for localization the detection plugin *cross-correlation* with default parameters and the *refinement* plugin *TNT Fitter* with pixel-integrated Gaussian MLE fitting were used. Localizations in adjacent frames with a distance of less than 100 nm were connected to a “track,” and the position was re-fitted using the sum of all images of the track.

310 For spectral splitting, localizations were first done on a sum image of both channels. Subsequently, the amplitudes of the Gaussian PSFs were fitted separately in both spectral channels while keeping the PSF size and position fixed.

314 For lifetime fitting, for each localized molecule a TCSPC histogram was generated by collecting all photons in the corresponding frame with less than  $2 \sigma_{\text{PSF}}$  distance from the molecule’s center position. The TCSPC histogram was then fitted with a mono-exponential decay function using a maximum likelihood estimator<sup>[47]</sup> to determine the lifetime.

319 Single molecule lifetimes were converted into axial positions using a pre-calculated MIET curve. Localizations were filtered based on PSF size ( $100 \text{ nm} < \sigma_{\text{PSF}} < 160 \text{ nm}$ ), number of photons ( $> 200$ ), and quality of the lifetime fit ( $0.9 < \text{Pearson's } \chi^2 < 1.1$ ).

322  
323 For spectral splitting, molecules were sorted based on the spectral intensity ratio, defined  
324 as the intensity in the long wavelength channel divided by the sum of both intensities.  
325 Molecules with a ratio below 0.5 were classified as AF 647, molecule above 0.7 as CF  
326 680.

327 For super-resolution image reconstruction, localizations were reconstructed with a PSF of  
328 15 nm for the large images and 5 nm for the xz-cross sections.

329  
330 The calibration measurements (Figure 1) were analyzed in a similar fashion to the  
331 *d*STORM cell measurements with the following differences: For localization, 100 scans  
332 were combined to one frame and molecules not detected in at least two frames were re-  
333 jected during filtering. For each spacer thickness, the molecule heights were calculated  
334 with the corresponding MIET curve. The MIET curve shown in Figure 1c is calculated for  
335 a sample without spacer.

336  
337 The version of TrackNTrace used for this work includes a new plugin for spectral splitting  
338 and a data visualizer with added functionalities for MIET, and it is freely available on  
339 GitHub (<https://github.com/scstein/TrackNTrace>).

### 340 341 342 ***Modeling of MIET curves***

343  
344 MIET height-versus-lifetime curves were calculated using published scripts.<sup>[48]</sup> For this  
345 purpose, the geometric structure of the sample (layer composition and thickness values),  
346 the numeric aperture of the objective, the emission maximum of the fluorophore, its fluo-  
347 rescence lifetime and its fluorescence quantum yield have to be known. Quantum yield  
348 values were adjusted for the actual sample environment by multiplying measured quantum  
349 yield values with the ratio of the lifetime measured in the sample to the lifetime measured  
350 during quantum yield measurement. In all cases, a random fluorophore orientation was as-  
351 sumed.

### 352 353 ***Preparation of dsDNA for surface labelling***

354  
355 The following DNA sequences were used for surface immobilization: the single-stranded  
356 DNA (ssDNA 1) (5' → 3') fluorophore-GCAGCCACAACGTCATCATCGATT was  
357 biotinylated at its 5' end, while its complementary single-stranded DNA (ssDNA 2)  
358 AATCGATGATAGACGTTGTGGCTGC-biotin was labelled with a fluorophore (AF  
359 647) on its 3' end. These two DNA strands were hybridized at high concentration (200  
360 nM) by heating up to 94°C in an annealing buffer for 5 min, and then gradually cooled  
361 down to room temperature (30 min). The obtained dsDNA had a length of 25 nucleotides,  
362 which ensured its stability on a time scale of several weeks. The construct was designed in  
363 such way that the fluorophore faced the surfaces therefore decreasing the linkage errors in  
364 single molecule localization. The extra height due to the thickness of the biotin-avidin lay-  
365 er is between 12-16 nm<sup>[29]</sup> and it was taken into account when estimating the total height  
366 above the gold layer.

### 367 368 ***d*STORM buffer composition**

369  
370 For conventional *d*STORM imaging (utilizing AF 647 and CF 680), a switching buffer  
371 consisting of 50 mM cysteamine in PBS pH 7.4 was used. For reductive single molecule



372 localization microscopy utilizing Cy5b, the following procedure was used: First, the sam-  
373 ple was incubated in 0.1% NaBH<sub>4</sub>/ PBS solution for 30 min. Then, it was washed 2-3  
374 times with 0.1% NaBH<sub>4</sub>/PBS and measured in the same 0.1% NaBH<sub>4</sub>/PBS solution. After  
375 the measurement, it was washed and stored in PBS.

### 376 *Cell culture and antibody labeling*

377  
378 Cell lines were cultured at 37°C in 5% CO<sub>2</sub> in T25-culture flasks (Thermo Fischer Scien-  
379 tific, #156340). U2OS (human osteosarcoma cell line) and COS-7 (African green monkey  
380 kidney fibroblast cell line) were cultivated in Dulbecco's Modified Eagle Medium  
381 (DMEM/F12) with L-glutamine (Sigma, D8062) supplemented with 10% FBS (Sigma-  
382 Aldrich, F7524) and 100 U/mL penicillin + 0.1 mg/ml streptomycin (Sigma P4333).  
383  
384

385 For labeling antibodies with a varying degree of labelling (DOL), an excess of Alexa Flu-  
386 or 647 NHS-ester (LifeTech, A20106), CF680 NHS-ester (Biotium, #92220), or Cy5B  
387 NHS-ester, respectively, was used. The latter was kindly provided by Prof. Dr. Martin  
388 Schnermann (National Cancer Institute; Frederick, US-MD).<sup>[49]</sup> Goat anti-rabbit IgG (IgG-  
389 gam, Invitrogen, 31212) and goat anti-mouse IgG (IgG-gar, Sigma-Aldrich, SAB3701063-  
390 1) were used as secondary antibodies for staining. For NHS-labelling, 100 µg of antibod-  
391 ies were transferred to 100 mM sodium tetraborate buffer (Fluka, 71999) (pH 9.5) utiliz-  
392 ing Zeba™ Spin Desalting Columns 40K MWCO (Thermo Fischer Scientific, #87766)  
393 according to the protocol suggested by the manufacturer. Different excesses of NHS-ester  
394 dyes were used to achieve different DOLs. For IgG-gar coupled with Alexa Fluor 647,  
395 CF680, or Cy5B, an excess of 25x, 15x, and 20x was used to reach a DOL of ~ 8.3, 4.9,  
396 and 2.3, respectively. For IgG-gam coupled with Alexa Fluor 647 or CF680, an excess of  
397 25x and 15x was used to reach a DOL of ~ 8.5 and ~ 7.7, respectively. The reaction pro-  
398 ceeded for 4 h at RT while protected from light. Labelled antibodies were separated from  
399 free dye, washed three times, and reconstituted into PBS (Sigma-Aldrich, D8537-500 ML)  
400 using Zeba™ Spin Desalting Columns 40kDa MWCO. Antibody concentration and DOL  
401 were determined by UV-vis absorption spectrometry (Jasco V-650).  
402

### 403 *Immunostaining*

404  
405 For immunostaining, cells were seeded onto gold-coated coverslips at a concentration of  
406 5·10<sup>4</sup> cells/coverslip and cultivated overnight at 37°C and 5% CO<sub>2</sub>. For microtubule and  
407 clathrin immunostaining, cells were washed with pre-warmed (37°C) PBS, and  
408 permeabilized for 2 min with 0.3% glutaraldehyde (GA) + 0.25% Triton X-100 (EMS,  
409 16220 and Thermo Fisher, 28314) in pre-warmed (37°C) cytoskeleton buffer (CB) con-  
410 sisting of 10 mM MES (Sigma-Aldrich, M8250), pH 6.1), 150 mM NaCl (Sigma-Aldrich,  
411 55886), 5 mM EGTA (Sigma-Aldrich, 03777), 5 mM glucose (Sigma-Aldrich, G7021),  
412 and 5 mM MgCl<sub>2</sub> (Sigma-Aldrich, M9272). After permeabilization, cells were fixed with  
413 a pre-warmed (37°C) solution of 2% GA in CB for 10 min. After fixation, cells were  
414 washed twice with PBS and reduced with 0.1% sodium borohydride (Sigma-Aldrich,  
415 71320) in PBS for 7 min. Cells were again washed three times with PBS before blocking  
416 with 5% BSA (Roth, #3737.3) in PBS for 1 h. Subsequently, microtubule samples were  
417 incubated with 4 ng/µL rabbit anti-α-tubulin antibody (Abcam, #ab18251) or mouse anti-  
418 β-tubulin antibody (Sigma-Aldrich, T8328), and clathrin samples were incubated with 4  
419 ng/µL rabbit anti-clathrin antibody (Abcam, #ab21679) or mouse anti-clathrin antibody  
420 (Abcam, #2731) in blocking buffer for 1 h. After primary antibody incubation, cells were  
421 washed thrice with 0.1% Tween20 (Thermo Fisher, 28320) in PBS for 15 min. After

422 washing, cells were incubated in blocking buffer with 8 ng/ $\mu$ L of custom labeled second-  
423 ary antibodies or of commercial IgG-gam-F(ab')<sub>2</sub>-Alexa Fluor 647 (DOL ~ 3) (Thermo  
424 Fisher, A-21237) for 45 min. After secondary antibody incubation, cells were again  
425 washed three times with 0.1% Tween20 in PBS for 15 min. After washing, a post-fix with  
426 4% formaldehyde (Sigma-Aldrich, F8775) in PBS for 10 min was performed followed by  
427 three additional washing steps with PBS.

### 428 *Fluorescence quantum yield measurements*

429  
430 We used a plasmonic nanocavity and a custom-built scanning confocal microscope for  
431 absolute fluorescence quantum yield determination.<sup>[43]</sup> The cavity mirrors were prepared  
432 by chemical vapor deposition of silver on the surface of a clean glass cover slide (bottom  
433 mirror) and a plane-convex lens (top mirror) by using a Laybold Univex 350 evaporation  
434 machine under high-vacuum conditions ( $\sim 10^{-6}$  mbar). The bottom and top mirrors had a  
435 thickness of 30 and 60 nm, respectively. The distance between the cavity mirrors was  
436 monitored by measuring a white light transmission spectrum using an Andor SR 303i  
437 spectrograph and an emCCD camera (Andor iXon DU897 BV). By fitting these spectra  
438 with a standard Fresnel model of transmission through a stack of plan-parallel layers, one  
439 can determine the precise cavity length (distance between mirrors). Fluorescence lifetime  
440 measurements were performed with a custom-built confocal microscope equipped with an  
441 objective lens of high numerical aperture (Apo N, 60 $\times$ /1.49 NA oil immersion, Olympus).  
442 A white light laser system (Fianium SC400-4-20) with a tunable filter (AOTFnC-400.650-  
443 TN) served as excitation source ( $\lambda_{\text{exc}} = 640$  nm). Collected fluorescence was focused onto  
444 the active area of a single photon detection module (MPD series, PDM). Data acquisition  
445 was accomplished with a multichannel picosecond event timer (PicoQuant HydraHarp  
446 400). Photon arrival times were histogrammed (bin width of 50 ps) for obtaining fluores-  
447 cence decay curves. From the obtained lifetime-versus- cavity size curves, absolute values  
448 of quantum yields were obtained by fitting an appropriate model.<sup>[43]</sup>

450

451 **Acknowledgments**

452 The authors thank Dr. Ingo Gregor for fruitful discussions. J.E., J.C.T., and O.N. are grate-  
453 ful to the European Research Council (ERC) via project “smMIET” (Grant agreement No.  
454 884488) under the European Union’s Horizon 2020 research and innovation program. J.E.  
455 is grateful for financial support through Germany’s Excellence Strategy - EXC 2067/1-  
456 390729940. M. J. and M.S. acknowledge financial support by the DFG (GRK 2157). M.S.  
457 is grateful for financial support by the European Research Council via the ERC Synergy  
458 Grant project “ULTRARESOLUTION” (Project No. 951275).  
459

460 **Author contributions**

461 J.C.T., M.J., D.H., M.S., J.E. and O.N. designed the experiments. J.C.T. and O.N. generat-  
462 ed and processed the data. D.H. and M.J. labelled antibodies and prepared cells for  
463 dSTORM measurements. R.T. prepared dsDNA for surface labelling. A.C. prepared co-  
464 verslips for MIET-imaging. A. I. C. performed quantum yield measurements. M. S. per-  
465 formed synthesis of Cy5b dye. J.C.T. wrote the analysis software. J.C.T., M.J., D.H., R.T.,  
466 M.S., J.E. and O.N wrote and finalized the manuscript.  
467

468 **Competing interests**

469 The authors declare no conflicts of interest.

470 **Data and materials availability**

471 The data that support the findings of this study are available from the corresponding au-  
472 thor upon reasonable request. The analysis software TrackNTrace is available on Github  
473 (<https://github.com/scstein/TrackNTrace>).  
474

475 **Figures**

476

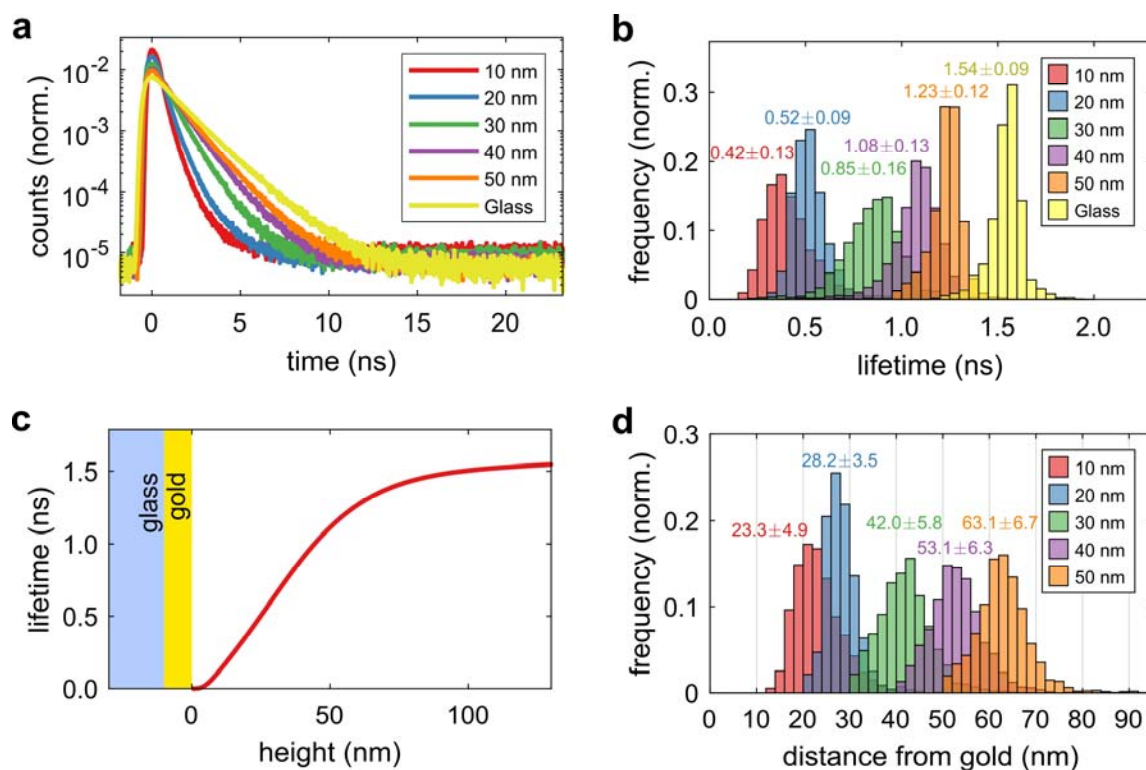

477

478 **Fig. 1. MIET-SMLM validation.** (a) TCSPC curves for DNA labelled with AF 647 on MIET  
 479 substrates with different SiO<sub>2</sub> spacers and on pure glass. (b) Single molecule lifetime his-  
 480 tograms of DNA labelled with AF 647 on MIET substrates with different SiO<sub>2</sub> spacers  
 481 and on pure glass. The lifetime histograms include data from several regions of interest. (c)  
 482 MIET-curve for AF 647 above a MIET substrate with a 10 nm gold layer. (d) Histograms  
 483 of axial positions (height values) of single molecules calculated with the MIET-curve  
 484 from their measured lifetimes. Averages and standard deviations of lifetime and height  
 485 values are given next to each peak.

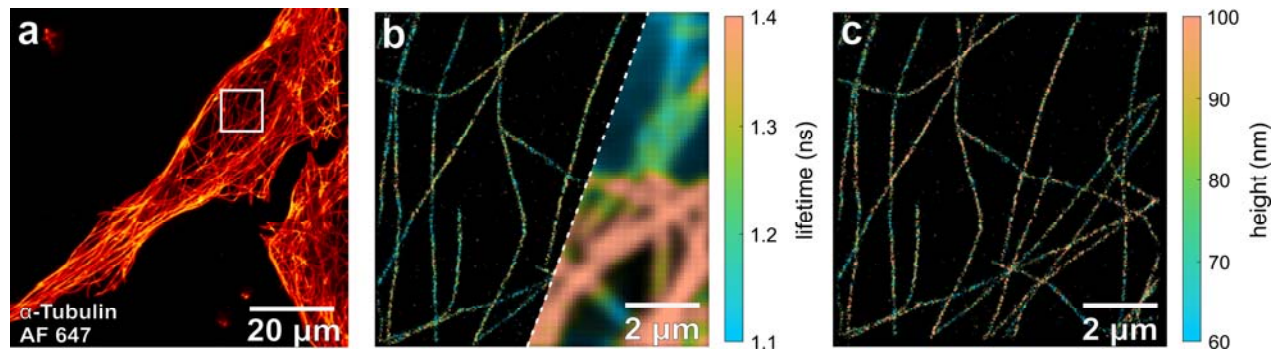

486  
487 **Fig. 2. MIET-*d*STORM imaging in cells.** (a) Confocal laser-scanning image of  $\alpha$ -tubulin  
488 filaments in U2OS cells labelled with AF 647. (b) Confocal FLIM and super-  
489 resolved FLIM image of the region-of-interest marked in (a). (c) Super-resolved  
490 height image of the corresponding region-of-interest.  
491



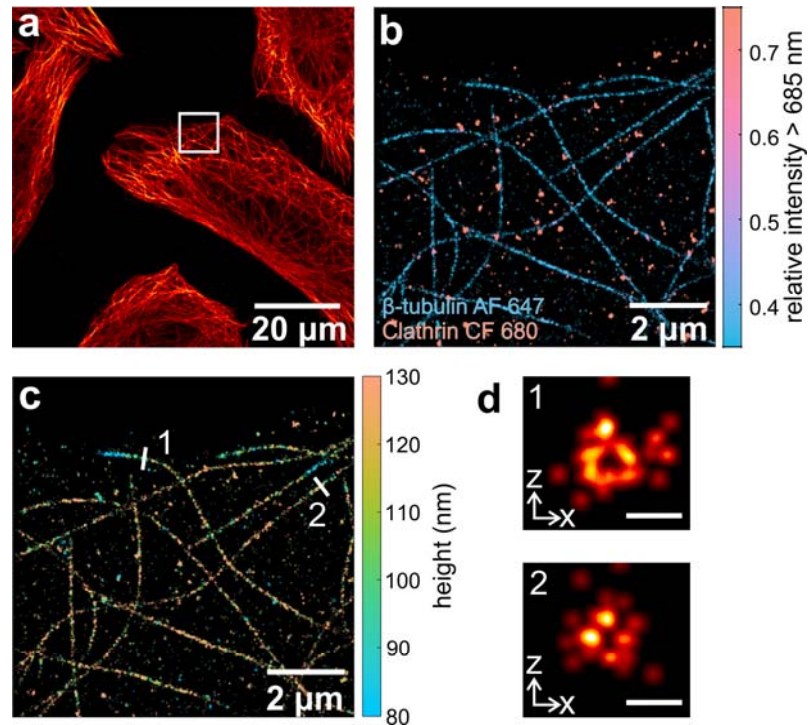

**Fig. 3. Simultaneous dual-color MIET-*d*STORM imaging in cells.** (a) Diffraction-limited confocal laser-scanning image of  $\beta$ -tubulin and clathrin in COS-7 cells labelled with AF 647 and CF 680, respectively. (b) Sd-*d*STORM image of the region-of-interest marked in (a). (c) Three-dimensional MIET-*d*STORM image of the region-of-interest marked in (a), where lifetime values were converted to height values, and both targets are shown together. (d)  $xz$  cross-sections of microtubules 1 and 2 shown in (a). Scale bar is 50 nm.

492

493  
494  
495  
496  
497  
498  
499  
500

## References

- 501  
502  
503 [1] S. W. Hell, *Science* **2007**, *316*, 1153-1158.  
504 [2] S. W. Hell, S. Jakobs, L. Kastrop, *Appl. Phys. A* **2003**, *77*, 859-860.  
505 [3] M. J. Rust, M. Bates, X. Zhuang, *Nat. Methods* **2006**, *3*, 793-796.  
506 [4] E. Betzig, G. H. Patterson, R. Sougrat, O. W. Lindwasser, S. Olenych, J. S. Bonifacino, M. W. Davidson, J.  
507 Lippincott-Schwartz, H. F. Hess, *Science* **2006**, *313*, 1642-1645.  
508 [5] A. Sharonov, R. M. Hochstrasser, *Proc. Natl. Acad. Sci.* **2006**, *103*, 18911.  
509 [6] J. Schnitzbauer, M. T. Strauss, T. Schlichthaerle, F. Schueder, R. Jungmann, *Nat. Protoc.* **2017**, *12*, 1198-  
510 1228.  
511 [7] M. Heilemann, S. van de Linde, M. Schüttelpelz, R. Kasper, B. Seefeldt, A. Mukherjee, P. Tinnefeld, M.  
512 Sauer, *Angew. Chem. Int. Ed.* **2008**, *47*, 6172-6176.  
513 [8] M. Dyba, S. W. Hell, *Phys. Rev. Lett.* **2002**, *88*, 163901.  
514 [9] M. F. Juetter, T. J. Gould, M. D. Lessard, M. J. Mlodzianoski, B. S. Nagpure, B. T. Bennett, S. T. Hess, J.  
515 Bewersdorf, *Nat. Methods* **2008**, *5*, 527-529.  
516 [10] B. Huang, W. Wang, M. Bates, X. Zhuang, *Science* **2008**, *319*, 810-813.  
517 [11] S. R. P. Pavani, M. A. Thompson, J. S. Biteen, S. J. Lord, N. Liu, R. J. Twieg, R. Piestun, W. E. Moerner,  
518 *Proc. Natl. Acad. Sci.* **2009**, *106*, 2995.  
519 [12] M. D. Lew, S. F. Lee, M. Badiestostami, W. E. Moerner, *Opt. Lett.* **2011**, *36*, 202-204.  
520 [13] Y. Shechtman, L. E. Weiss, A. S. Backer, S. J. Sahl, W. E. Moerner, *Nano Lett.* **2015**, *15*, 4194-4199.  
521 [14] P. Bon, J. Linares-Lopez, M. Feyeux, K. Alessandri, B. Lounis, P. Nassoy, L. Cognet, *Nat. Methods* **2018**,  
522 *15*, 449-454.  
523 [15] G. Shtengel, J. A. Galbraith, C. G. Galbraith, J. Lippincott-Schwartz, J. M. Gillette, S. Manley, R. Sougrat,  
524 C. M. Waterman, P. Kanchanawong, M. W. Davidson, R. D. Fetter, H. F. Hess, *Proc. Natl. Acad. Sci.* **2009**,  
525 *106*, 3125.  
526 [16] R. Schmidt, C. A. Wurm, A. Punge, A. Egner, S. Jakobs, S. W. Hell, *Nano Lett.* **2009**, *9*, 2508-2510.  
527 [17] F. Huang, G. Sirinakis, E. S. Allgeyer, L. K. Schroeder, W. C. Duim, E. B. Kromann, T. Phan, F. E. Rivera-  
528 Molina, J. R. Myers, I. Irnov, M. Lessard, Y. Zhang, M. A. Handel, C. Jacobs-Wagner, C. P. Lusk, J. E.  
529 Rothman, D. Toomre, M. J. Booth, J. Bewersdorf, *Cell* **2016**, *166*, 1028-1040.  
530 [18] F. Balzarotti, Y. Eilers, K. C. Gwosch, A. H. Gynnä, V. Westphal, F. D. Stefani, J. Elf, S. W. Hell, *Science*  
531 **2017**, *355*, 606.  
532 [19] K. C. Gwosch, J. K. Pape, F. Balzarotti, P. Hoess, J. Ellenberg, J. Ries, S. W. Hell, *Nat. Methods* **2020**, *17*,  
533 217-224.  
534 [20] L. A. Masullo, F. Steiner, J. Zähringer, L. F. Lopez, J. Bohlen, L. Richter, F. Cole, P. Tinnefeld, F. D.  
535 Stefani, *Nano Lett.* **2021**, *21*, 840-846.  
536 [21] M. Cardoso Dos Santos, R. Déturche, C. Vézy, R. Jaffiol, *Biophys. J.* **2016**, *111*, 1316-1327.  
537 [22] L. Velas, M. Brameshuber, J. B. Huppa, E. Kurz, M. L. Dustin, P. Zelger, A. Jesacher, G. J. Schütz, *Nano*  
538 *Lett.* **2021**.  
539 [23] C. M. Winterflood, T. Ruckstuhl, D. Verdes, S. Seeger, *Phys. Rev. Lett.* **2010**, *105*, 108103.  
540 [24] J. Deschamps, M. Mund, J. Ries, *Opt. Express* **2014**, *22*, 29081-29091.  
541 [25] N. Bourg, C. Mayet, G. Dupuis, T. Barroca, P. Bon, S. Lécart, E. Fort, S. Lévêque-Fort, *Nat. Photonics*  
542 **2015**, *9*, 587-593.  
543 [26] A. I. Chizhik, J. Rother, I. Gregor, A. Janshoff, J. Enderlein, *Nat. Photonics* **2014**, *8*, 124-127.  
544 [27] N. Karedla, A. I. Chizhik, I. Gregor, A. M. Chizhik, O. Schulz, J. Enderlein, *ChemPhysChem* **2014**, *15*, 705-  
545 711.  
546 [28] N. Oleksiievets, J. C. Thiele, A. Weber, I. Gregor, O. Nevskiy, S. Isbaner, R. Tsukanov, J. Enderlein, *J.*  
547 *Phys. Chem. A* **2020**, *124*, 3494-3500.  
548 [29] S. Isbaner, N. Karedla, I. Kaminska, D. Ruhlandt, M. Raab, J. Bohlen, A. Chizhik, I. Gregor, P. Tinnefeld, J.  
549 Enderlein, R. Tsukanov, *Nano Lett.* **2018**, *18*, 2616-2622.  
550 [30] A. Zelená, S. Isbaner, D. Ruhlandt, A. Chizhik, C. Cassini, A. S. Klymchenko, J. Enderlein, A. Chizhik, S.  
551 Köster, *Nanoscale* **2020**, *12*, 21306-21315.  
552 [31] T. Baronsky, D. Ruhlandt, B. R. Brückner, J. Schäfer, N. Karedla, S. Isbaner, D. Hähnel, I. Gregor, J.  
553 Enderlein, A. Janshoff, A. I. Chizhik, *Nano Lett.* **2017**, *17*, 3320-3326.  
554 [32] A. M. Chizhik, D. Ruhlandt, J. Pfaff, N. Karedla, A. I. Chizhik, I. Gregor, R. H. Kehlenbach, J. Enderlein,  
555 *ACS Nano* **2017**, *11*, 11839-11846.  
556 [33] R. J. Moerland, J. P. Hoogenboom, *Optica* **2016**, *3*, 112-117.  
557 [34] A. Ghosh, A. I. Chizhik, N. Karedla, J. Enderlein, *Nat. Protoc.* **2021**.  
558 [35] A. Ghosh, A. Sharma, A. I. Chizhik, S. Isbaner, D. Ruhlandt, R. Tsukanov, I. Gregor, N. Karedla, J.  
559 Enderlein, *Nat. Photonics* **2019**, *13*, 860-865.

- 560 [36] I. Kaminska, J. Bohlen, S. Rocchetti, F. Selbach, G. P. Acuna, P. Tinnefeld, *Nano Lett.* **2019**, *19*, 4257-  
561 4262.
- 562 [37] J. C. Thiele, D. A. Helmerich, N. Oleksiievets, R. Tsukanov, E. Butkevich, M. Sauer, O. Nevskiy, J.  
563 Enderlein, *ACS Nano* **2020**, *14*, 14190-14200.
- 564 [38] Z. Zhang, S. J. Kenny, M. Hauser, W. Li, K. Xu, *Nat. Methods* **2015**, *12*, 935-938.
- 565 [39] K. Spaeth, A. Brecht, G. Gauglitz, *J. Colloid Interface Sci.* **1997**, *196*, 128-135.
- 566 [40] K. I. Mortensen, L. S. Churchman, J. A. Spudich, H. Flyvbjerg, *Nat. Methods* **2010**, *7*, 377-381.
- 567 [41] B. Rieger, S. Stallinga, *ChemPhysChem* **2014**, *15*, 664-670.
- 568 [42] P. Eiring, R. McLaughlin, S. S. Matikonda, Z. Han, L. Grabenhorst, D. A. Helmerich, M. Meub, G. Beliu,  
569 M. Luciano, V. Bandi, N. Zijlstra, Z.-D. Shi, S. G. Tarasov, R. Swenson, P. Tinnefeld, V. Glembockyte, T.  
570 Cordes, M. Sauer, M. J. Schnermann, *Angew. Chem. Int. Ed.* **2021**, *60*, 26685-26693.
- 571 [43] A. I. Chizhik, I. Gregor, B. Ernst, J. Enderlein, *ChemPhysChem* **2013**, *14*, 505-513.
- 572 [44] S. M. Früh, U. Matti, P. R. Spycher, M. Rubini, S. Lickert, T. Schlichthaerle, R. Jungmann, V. Vogel, J.  
573 Ries, I. Schoen, *ACS Nano* **2021**, *15*, 12161-12170.
- 574 [45] I. Kamińska, J. Bohlen, R. Yaadav, P. Schüler, M. Raab, T. Schröder, J. Zähringer, K. Zielonka, S. Krause,  
575 P. Tinnefeld, *Adv. Mater.* **2021**, *n/a*, 2101099.
- 576 [46] S. Stein, J. Thiart, *Sci. Rep.* **2016**, *6*, 37947.
- 577 [47] J. C. Thiele, O. Nevskiy, D. A. Helmerich, M. Sauer, J. Enderlein, *Front. Bioinform.* **2021**, *1*, 56.
- 578 [48] N. Karedla, A. M. Chizhik, S. C. Stein, D. Ruhlandt, I. Gregor, A. I. Chizhik, J. Enderlein, *J. Chem. Phys.*  
579 **2018**, *148*, 204201.
- 580 [49] P. Eiring, R. McLaughlin, S. S. Matikonda, Z. Han, L. Grabenhorst, D. A. Helmerich, M. Meub, G. Beliu,  
581 M. Luciano, V. Bandi, N. Zijlstra, Z.-D. Shi, S. Tarasov, R. Swenson, P. Tinnefeld, V. Glembockyte, T.  
582 Cordes, M. Sauer, M. Schnermann, *Angew. Chem. Int. Ed.* **2021**, *n/a*.
- 583
